# Supplementary material for: EEG-Based Mapping of Resting-State Functional Brain Networks in Patients with Parkinson’s Disease
Source: MDPI journal article supplement (doi:10.3390/biomimetics7040231), 2022-12-08
Supplement: s1 [file s1]

## Supplementary Materials

**Table S1 A:** Definition of network hubs in the CEN using anatomy and Brodmann Areas

| Brodman Area | Anatomy                                                             | Acronym        |
|--------------|---------------------------------------------------------------------|----------------|
| 6            | Supplementary motor area                                            | SMA            |
| 7            | Superior parietal gyrus                                             | SPG            |
| 32 + 8       | Prefrontal motor cortex, Pregenua<br>anterior cingulate cortex      | Pre-SMA, prACC |
| 46 + 9       | Median prefrontal cortex, Dorso lateral<br>prefrontal cortex        | MPFC, DLPFC    |
| 10           | Anterior lateral prefrontal cortex                                  | ALPFC          |
| 47 + 11      | Ventro-lateral prefrontal cortex, Orbital<br>frontal cortex         | VLPFC, OFC     |
| 20 + 21 + 37 | Inferior and middle temporal gyrus,<br>Occipital-temporal cortex    | ITG, MTG, OTC  |
| 23 + 24      | Posterior cingulate cortex1, Dorsal<br>anterior cingulate cortex    | PCC1, DACC     |
| 22 + 39 + 40 | Superior temporal gyrus, Angular<br>gyrus, Intra-parietal sulcus    | STG, AG, IPS   |
| 44 + 45      | Opercular part of inferior frontal gyrus,<br>Inferior frontal gyrus | OPCG, IFG      |
| 48           |                                                                     | BA 48          |

**Table S1 B:** Definition of network hubs in the DAN using anatomy and Brodmann Areas

| Brodman Area | Anatomy                                                          | Acronym       |
|--------------|------------------------------------------------------------------|---------------|
| 1 + 2 + 3    | Primary, secondary and tertiary<br>somatosensory cortex          | S1, S2, S3    |
| 5            | Secondary somatosensory sulcus                                   | SPS           |
| 6 + 8        | Supplementary motor area, Pre-<br>supplementary motor area       | SMA, Pre-SMA  |
| 7            | Superior parietal gyrus                                          | SPG           |
| 18 + 19      | Secondary visual cortex, Cuneus                                  | V2, Cuneus    |
| 20 + 21 + 37 | Inferior and middle temporal gyrus,<br>Occipital-temporal cortex | ITG, MTG, OTC |
| 39 + 40      | Angular gyrus, Intra-parietal sulcus                             | AG, IPS       |
| 44           | Opercular part of inferior frontal gyrus                         | OPCG          |
| 48           |                                                                  | BA48          |

**Table S1 C:** Definition of network hubs in the VAN using anatomy and Brodmann Areas

| Brodmann Area | Anatomy                                                                       | Acronym         |
|---------------|-------------------------------------------------------------------------------|-----------------|
| 1 + 2 + 3 + 5 | Primary, secondary and tertiary somatosensory cortex, Superior parietal gyrus | S1, S2, S3, SPS |
| 6             | Supplementary motor area                                                      | SMA             |
| 46 + 9        | Medial prefrontal cortex, Dorso lateral prefrontal cortex                     | MPFC, DLPFC     |
| 47 + 11       | Ventro-lateral prefrontal cortex, Orbital frontal cortex                      | VLPFC, OFC      |
| 20 + 21 + 37  | Inferior and middle temporal gyrus, Occipital-temporal cortex                 | ITG, MTG, OTC   |
| 22 + 39 + 40  | Superior temporal gyrus, Angular gyrus, Intra-parietal sulcus                 | STG, AG, IPS    |
| 23 + 24       | Posterior cingulate cortex1                                                   | PCC1, DACC      |
| 32            | Pregenual anterior cingulate cortex                                           | prACC           |
| 41 + 42       | Primary and secondary auditory cortex                                         | A1, A2          |
| 44 + 45       | Opercular part of inferior frontal gyrus, Inferior frontal gyrus              | OPCG, IFG       |
| 48            |                                                                               | BA 48           |

**Table S1 D:** Definition of network hubs in the SMN using anatomy and Brodmann Areas

| Brodmann Area | Anatomy                                                                       | Acronym         |
|---------------|-------------------------------------------------------------------------------|-----------------|
| 1 + 2 + 3 + 5 | Primary, secondary and tertiary somatosensory cortex, Superior parietal gyrus | S1, S2, S3, SPS |
| 4             | Primary motor cortex                                                          | M1              |
| 6             | Supplementary motor area                                                      | SMA             |
| 21            | Middle temporal gyrus                                                         | MTG             |
| 22 + 40       | Superior temporal gyrus, Intra-parietal sulcus                                | STG, IPS        |
| 23 + 24       | Posterior cingulate cortex1                                                   | PCC1, DACC      |
| 38            | Temporal pole                                                                 | TP              |
| 41 + 42       | Primary and secondary auditory cortex                                         | A1, A2          |
| 43            | Postcentral gyrus                                                             | PCG             |
| 48            |                                                                               | BA 48           |

**Table S2:** Post-Hoc analysis for the differences in percent of significant tPDC between the four RSNs

| (I)<br>Network | (J)<br>Network | Mean<br>Difference<br>(I-J) | Std.<br>Error | df      | Sig. <sup>c</sup> | 95% Confidence Interval<br>for Difference <sup>c</sup> |                |
|----------------|----------------|-----------------------------|---------------|---------|-------------------|--------------------------------------------------------|----------------|
|                |                |                             |               |         |                   | Lower<br>Bound                                         | Upper<br>Bound |
| CEN            | DAN            | -.037 <sup>*</sup>          | .006          | 627.000 | .000              | -.049                                                  | -.026          |
|                | VAN            | -.115 <sup>*</sup>          | .006          | 627.000 | .000              | -.127                                                  | -.104          |
|                | SMN            | -.094 <sup>*</sup>          | .006          | 627.000 | .000              | -.106                                                  | -.083          |
| DAN            | CEN            | .037 <sup>*</sup>           | .006          | 627.000 | .000              | .026                                                   | .049           |
|                | VAN            | -.078 <sup>*</sup>          | .006          | 627.000 | .000              | -.089                                                  | -.066          |
|                | SMN            | -.057 <sup>*</sup>          | .006          | 627.000 | .000              | -.068                                                  | -.045          |
| VAN            | CEN            | .115 <sup>*</sup>           | .006          | 627.000 | .000              | .104                                                   | .127           |
|                | DAN            | .078 <sup>*</sup>           | .006          | 627.000 | .000              | .066                                                   | .089           |
|                | SMN            | .021 <sup>*</sup>           | .006          | 627.000 | .000              | .009                                                   | .032           |
| SMN            | CEN            | .094 <sup>*</sup>           | .006          | 627.000 | .000              | .083                                                   | .106           |
|                | DAN            | .057 <sup>*</sup>           | .006          | 627.000 | .000              | .045                                                   | .068           |
|                | VAN            | -.021 <sup>*</sup>          | .006          | 627.000 | .000              | -.032                                                  | -.009          |

\*significant at the .05 level, a. Dependent Variable: RSN, c. Adjustment for multiple comparisons.

**Table S3 A:** Averaged tPDC values for each group in the DAN (PD>HC in **red**, HC>PD in **blue**)

| band  | Connection                  | Group    |          |
|-------|-----------------------------|----------|----------|
|       |                             | HC       | PD       |
| theta | AG, IPS->SPS                | 0.165062 | 0.841119 |
|       | BA 48->OPCG                 | 0.003678 | 0.005037 |
|       | SMA, Pre-SMA->SPG           | 0.081502 | 0.073379 |
|       | SPG->SPS                    | 0.176137 | 0.158872 |
|       | ITG, MTG, OTC->S1, S2, S3   | 0.008746 | 0.007248 |
|       | ITG, MTG, OTC->SPS          | 0.111137 | 0.086914 |
|       | ITG, MTG, OTC->SMA, Pre-SMA | 0.013424 | 0.010598 |
|       | ITG, MTG, OTC->SPG          | 0.048775 | 0.037298 |
|       | AG, IPS->SMA, Pre-SMA       | 0.026156 | 0.024814 |
|       | OPCG->SPG                   | 0.072214 | 0.065742 |
|       | BA 48->SPG                  | 0.084869 | 0.07343  |
| alpha | S1, S2, S3->SPS             | 0.155918 | 0.176483 |
|       | S1, S2, S3->SMA, Pre-SMA    | 0.01817  | 0.019479 |
|       | BA 48->SMA, Pre-SMA         | 0.020515 | 0.021926 |
|       | SMA, Pre-SMA->SPG           | 0.078535 | 0.073639 |
|       | V2, Cuneus->S1, S2, S3      | 0.011762 | 0.011148 |
|       | V2, Cuneus->SPS             | 0.177187 | 0.170688 |
|       | ITG, MTG, OTC->SMA, Pre-SMA | 0.012309 | 0.010048 |
|       | ITG, MTG, OTC->SPG          | 0.047321 | 0.036748 |
|       | AG, IPS->SPG                | 0.02247  | 0.021123 |
|       | OPCG->SPG                   | 0.072582 | 0.065844 |
|       | BA 48->SPG                  | 0.075564 | 0.070626 |
| beta  | SMA, Pre-SMA->SPS           | 0.155838 | 0.152654 |
|       | ITG, MTG, OTC->SMA, Pre-SMA | 0.011792 | 0.008734 |
|       | AG, IPS->SPG                | 0.077027 | 0.068891 |
|       | OPCG->SPS                   | 0.178938 | 0.169326 |
|       | OPCG->SPG                   | 0.076796 | 0.069918 |
|       | BA 48->SPS                  | 0.16947  | 0.158813 |

**Table S3 B:** Averaged tPDC values for each group in the CEN (PD>HC in **red**, HC>PD in **blue**)

| band         | Connection                    | Group    |          |
|--------------|-------------------------------|----------|----------|
|              |                               | HC       | PD       |
| <b>theta</b> | ALPFC->VLPFC, OFC             | 0.027856 | 0.030985 |
|              | PCC1, DACC->Pre-SMA, prACC    | 0.014274 | 0.015479 |
|              | BA 48->VLPFC, OFC             | 0.035524 | 0.04075  |
|              | SMA->Pre-SMA, prACC           | 0.016614 | 0.01281  |
|              | SMA->ALPFC                    | 0.003781 | 0.002969 |
|              | SMA->VLPFC, OFC               | 0.032847 | 0.031222 |
|              | SMA-> STG, AG, IPS            | 0.014524 | 0.010905 |
|              | SPG->SMA                      | 0.010936 | 0.008078 |
|              | SPG->STG, AG, IPS             | 0.012446 | 0.011548 |
|              | MPFC, DLPFC->SMA              | 0.010112 | 0.009144 |
|              | ALPFC->MPFC, DLPFC            | 0.007965 | 0.007002 |
|              | VLPFC, OFC->SMA               | 0.009032 | 0.006302 |
|              | VLPFC, OFC->SPG               | 0.022775 | 0.017628 |
|              | VLPFC, OFC->Pre-SMA, prACC    | 0.012861 | 0.009675 |
|              | VLPFC, OFC->ALPFC             | 0.005412 | 0.003669 |
|              | VLPFC, OFC->STG, AG, IPS      | 0.012633 | 0.009014 |
|              | ITG, MTG, OTC->VLPFC, OFC     | 0.024838 | 0.018922 |
|              | PCC1, DACC->SMA               | 0.01371  | 0.012098 |
|              | STG, AG, IPS ->Pre-SMA, prACC | 0.014021 | 0.012082 |
|              | STG, AG, IPS ->ALPFC          | 0.003117 | 0.002882 |
|              | STG, AG, IPS ->VLPFC, OFC     | 0.033338 | 0.0267   |
|              | BA 48->STG, AG, IPS           | 0.012401 | 0.011434 |
| <b>alpha</b> | OPCG, IFG->MPFC, DLPFC        | 0.012729 | 0.013786 |
|              | SMA->ALPFC                    | 0.003478 | 0.002763 |
|              | SMA->STG, AG, IPS             | 0.014939 | 0.009784 |
|              | SPG->Pre-SMA, prACC           | 0.014784 | 0.01101  |
|              | Pre-SMA, prACC->ALPFC         | 0.003125 | 0.002304 |
|              | MPFC, DLPFC->SMA              | 0.003929 | 0.003624 |
|              | MPFC, DLPFC->VLPFC, OFC       | 0.010317 | 0.008888 |
|              | MPFC, DLPFC->STG, AG, IPS     | 0.031031 | 0.027145 |
|              | ALPFC->SMA                    | 0.013517 | 0.009939 |
|              | ALPFC->VLPFC, OFC             | 0.010564 | 0.007896 |
|              | VLPFC, OFC->SPG               | 0.008473 | 0.006937 |
|              | VLPFC, OFC->Pre-SMA, prACC    | 0.022638 | 0.018974 |
|              | ITG, MTG, OTC->Pre-SMA, prACC | 0.011917 | 0.009865 |

|             |                               |          |          |
|-------------|-------------------------------|----------|----------|
|             | ITG, MTG, OTC->VLPFC, OFC     | 0.006807 | 0.005398 |
|             | PCC1, DACC->SPG               | 0.020544 | 0.016301 |
|             | STG, AG, IPS ->SMA            | 0.027822 | 0.020953 |
|             | STG, AG, IPS ->SPG            | 0.0093   | 0.008468 |
|             | STG, AG, IPS ->Pre-SMA, prACC | 0.025067 | 0.022637 |
|             | STG, AG, IPS ->ALPFC          | 0.012113 | 0.011361 |
|             | OPCG, IFG->SMA                | 0.003119 | 0.002927 |
|             | OPCG, IFG->SPG                | 0.011297 | 0.010809 |
|             | OPCG, IFG->ALPFC              | 0.012816 | 0.01157  |
|             | OPCG, IFG-> STG, AG, IPS      | 0.004081 | 0.003834 |
|             | BA 48->Pre-SMA, prACC         | 0.012697 | 0.011182 |
| <b>beta</b> | SMA-> STG, AG, IPS            | 0.013386 | 0.009655 |
|             | SPG->Pre-SMA, prACC           | 0.012582 | 0.011122 |
|             | Pre-SMA, prACC->SPG           | 0.02534  | 0.022516 |
|             | Pre-SMA, prACC->ALPFC         | 0.003679 | 0.003173 |
|             | MPFC, DLPFC->STG, AG, IPS     | 0.012446 | 0.010562 |
|             | ITG, MTG, OTC->SMA            | 0.005636 | 0.004084 |
|             | ITG, MTG, OTC->VLPFC, OFC     | 0.022158 | 0.018074 |
|             | PCC1, DACC->SPG               | 0.0331   | 0.024536 |
|             | PCC1, DACC->Pre-SMA, prACC    | 0.016392 | 0.013535 |
|             | STG, AG, IPS ->SPG            | 0.027397 | 0.021954 |
|             | OPCG, IFG->ALPFC              | 0.00417  | 0.003863 |
|             | OPCG, IFG-> STG, AG, IPS      | 0.012495 | 0.010613 |

**Table S3 C:** Averaged tPDC values for each group in the VAN (PD>HC in **red**, HC>PD in **blue**)

| band         | Connection                    | Group    |          |
|--------------|-------------------------------|----------|----------|
|              |                               | HC       | PD       |
| <b>theta</b> | S1, S2, S3, SPS->VLPFC, OFC   | 0.038812 | 0.045667 |
|              | SMA->S1, S2, S3, SPS          | 0.074118 | 0.076505 |
|              | SMA->STG, AG, IPS             | 0.117284 | 0.141681 |
|              | MPFC, DLPFC->ITG, MTG, OTC    | 0.075305 | 0.085393 |
|              | MPFC, DLPFC->STG, AG, IPS     | 0.11335  | 0.129263 |
|              | MPFC, DLPFC->BA 48            | 0.014331 | 0.017096 |
|              | VLPFC, OFC->STG, AG, IPS      | 0.12408  | 0.143758 |
|              | VLPFC, OFC->A1, A2            | 0.025426 | 0.028204 |
|              | ITG, MTG, OTC->A1, A2         | 0.023329 | 0.025081 |
|              | STG, AG, IPS->SMA             | 0.141363 | 0.155686 |
|              | STG, AG, IPS->ITG, MTG, OTC   | 0.091686 | 0.102521 |
|              | STG, AG, IPS->PCC1, DACC      | 0.011053 | 0.012651 |
|              | STG, AG, IPS->A1, A2          | 0.024315 | 0.026818 |
|              | STG, AG, IPS->BA 48           | 0.022324 | 0.02557  |
|              | PCC1, DACC->BA 48             | 0.018093 | 0.018961 |
|              | prACC->S1, S2, S3, SPS        | 0.079102 | 0.086482 |
|              | prACC->OPCG, IFG              | 0.057901 | 0.064902 |
|              | A1, A2->BA 48                 | 0.016888 | 0.021131 |
|              | OPCG, IFG->S1, S2, S3, SPS    | 0.09215  | 0.096635 |
|              | OPCG, IFG->A1, A2             | 0.021438 | 0.02693  |
|              | S1, S2, S3, SPS->MPFC, DLPFC  | 0.197328 | 0.16397  |
|              | MPFC, DLPFC->SMA              | 0.139404 | 0.123676 |
|              | MPFC, DLPFC->VLPFC, OFC       | 0.044181 | 0.038422 |
|              | VLPFC, OFC->SMA               | 0.165549 | 0.147758 |
|              | ITG, MTG, OTC->MPFC, DLPFC    | 0.213123 | 0.175946 |
|              | STG, AG, IPS->S1, S2, S3, SPS | 0.09539  | 0.081995 |
|              | PCC1, DACC->prACC             | 0.033422 | 0.030445 |
|              | prACC->MPFC, DLPFC            | 0.207296 | 0.191777 |
|              | A1, A2->SMA                   | 0.154582 | 0.140783 |
| <b>alpha</b> | S1, S2, S3, SPS->VLPFC, OFC   | 0.042966 | 0.04687  |
|              | S1, S2, S3, SPS->OPCG, IFG    | 0.057482 | 0.064588 |
|              | SMA->ITG, MTG, OTC            | 0.085385 | 0.097471 |
|              | SMA->STG, AG, IPS             | 0.119706 | 0.143383 |
|              | SMA->A1, A2                   | 0.02418  | 0.026441 |
|              | SMA->OPCG, IFG                | 0.044313 | 0.051071 |

|             |                              |          |          |
|-------------|------------------------------|----------|----------|
|             | SMA->BA 48                   | 0.020821 | 0.0221   |
|             | MPFC, DLPFC->ITG, MTG, OTC   | 0.079197 | 0.088296 |
|             | MPFC, DLPFC->STG, AG, IPS    | 0.113635 | 0.128475 |
|             | MPFC, DLPFC->prACC           | 0.022263 | 0.023397 |
|             | MPFC, DLPFC->BA 48           | 0.015172 | 0.018154 |
|             | VLPFC, OFC->STG, AG, IPS     | 0.121081 | 0.140821 |
|             | VLPFC, OFC->A1, A2           | 0.024255 | 0.026791 |
|             | ITG, MTG, OTC->STG, AG, IPS  | 0.113494 | 0.137682 |
|             | ITG, MTG, OTC->A1, A2        | 0.023282 | 0.025237 |
|             | STG, AG, IPS->SMA            | 0.147693 | 0.154757 |
|             | STG, AG, IPS->ITG, MTG, OTC  | 0.09515  | 0.104476 |
|             | STG, AG, IPS->PCC1, DACC     | 0.014835 | 0.015997 |
|             | STG, AG, IPS->A1, A2         | 0.024541 | 0.028306 |
|             | STG, AG, IPS->OPCG, IFG      | 0.075045 | 0.079609 |
|             | PCC1, DACC->STG, AG, IPS     | 0.143965 | 0.15967  |
|             | prACC->S1, S2, S3, SPS       | 0.077081 | 0.080872 |
|             | prACC->A1, A2                | 0.032626 | 0.037358 |
|             | prACC->OPCG, IFG             | 0.058315 | 0.068053 |
|             | A1, A2->S1, S2, S3, SPS      | 0.08788  | 0.091456 |
|             | A1, A2->STG, AG, IPS         | 0.129336 | 0.141477 |
|             | A1, A2->BA 48                | 0.016866 | 0.022059 |
|             | OPCG, IFG->S1, S2, S3, SPS   | 0.084277 | 0.088126 |
|             | OPCG, IFG->ITG, MTG, OTC     | 0.08954  | 0.098357 |
|             | OPCG, IFG->STG, AG, IPS      | 0.131995 | 0.145958 |
|             | OPCG, IFG->BA 48             | 0.018464 | 0.020665 |
|             | BA 48->ITG, MTG, OTC         | 0.094532 | 0.102405 |
|             | BA 48->STG, AG, IPS          | 0.161338 | 0.165834 |
|             | BA 48->prACC                 | 0.032994 | 0.034273 |
|             | BA 48->A1, A2                | 0.024615 | 0.025568 |
|             | S1, S2, S3, SPS->SMA         | 0.156634 | 0.147743 |
|             | S1, S2, S3, SPS->MPFC, DLPFC | 0.209815 | 0.16552  |
|             | SMA->prACC                   | 0.029612 | 0.028016 |
|             | MPFC, DLPFC->S1, S2, S3, SPS | 0.072    | 0.063245 |
|             | MPFC, DLPFC->SMA             | 0.132357 | 0.126287 |
|             | MPFC, DLPFC->VLPFC, OFC      | 0.041938 | 0.039489 |
|             | ITG, MTG, OTC->SMA           | 0.160842 | 0.150335 |
|             | ITG, MTG, OTC->MPFC, DLPFC   | 0.225312 | 0.190294 |
|             | STG, AG, IPS->MPFC, DLPFC    | 0.202571 | 0.178051 |
|             | OPCG, IFG->SMA               | 0.154295 | 0.139485 |
|             | BA 48->MPFC, DLPFC           | 0.198181 | 0.183529 |
| <b>beta</b> | S1, S2, S3, SPS->VLPFC, OFC  | 0.03925  | 0.041495 |



|                                |          |          |
|--------------------------------|----------|----------|
| S1, S2, S3, SPS->STG, AG, IPS  | 0.129371 | 0.135208 |
| SMA->STG, AG, IPS              | 0.122397 | 0.134566 |
| SMA->OPCG, IFG                 | 0.051191 | 0.055433 |
| MPFC, DLPFC->STG, AG, IPS      | 0.114776 | 0.123831 |
| VLPFC, OFC->ITG, MTG, OTC      | 0.102351 | 0.104463 |
| VLPFC, OFC->prACC              | 0.028587 | 0.029317 |
| VLPFC, OFC->A1, A2             | 0.024496 | 0.025412 |
| ITG, MTG, OTC->S1, S2, S3, SPS | 0.088135 | 0.092943 |
| ITG, MTG, OTC->A1, A2          | 0.027597 | 0.030245 |
| STG, AG, IPS->ITG, MTG, OTC    | 0.094601 | 0.10189  |
| PCC1, DACC->ITG, MTG, OTC      | 0.098846 | 0.104746 |
| PCC1, DACC->STG, AG, IPS       | 0.140701 | 0.14855  |
| PCC1, DACC->prACC              | 0.034722 | 0.03677  |
| PCC1, DACC->BA 48              | 0.020018 | 0.020653 |
| prACC->ITG, MTG, OTC           | 0.099225 | 0.105332 |
| prACC->STG, AG, IPS            | 0.132566 | 0.143385 |
| prACC->A1, A2                  | 0.029901 | 0.032287 |
| A1, A2->ITG, MTG, OTC          | 0.089501 | 0.102951 |
| A1, A2->OPCG, IFG              | 0.053638 | 0.067312 |
| A1, A2->BA 48                  | 0.020504 | 0.022652 |
| OPCG, IFG->STG, AG, IPS        | 0.133818 | 0.146892 |
| BA 48->STG, AG, IPS            | 0.147929 | 0.161936 |
| S1, S2, S3, SPS->MPFC, DLPFC   | 0.202251 | 0.167243 |
| SMA->S1, S2, S3, SPS           | 0.076856 | 0.072881 |
| SMA->MPFC, DLPFC               | 0.204527 | 0.180016 |
| SMA->BA 48                     | 0.019973 | 0.019254 |
| MPFC, DLPFC->SMA               | 0.128873 | 0.118377 |
| VLPFC, OFC->OPCG, IFG          | 0.060534 | 0.058969 |
| ITG, MTG, OTC->MPFC, DLPFC     | 0.229944 | 0.202678 |
| ITG, MTG, OTC->VLPFC, OFC      | 0.046114 | 0.040381 |
| STG, AG, IPS->MPFC, DLPFC      | 0.205045 | 0.182689 |
| PCC1, DACC->MPFC, DLPFC        | 0.190446 | 0.179004 |
| PCC1, DACC->VLPFC, OFC         | 0.046869 | 0.044612 |
| prACC->SMA                     | 0.161853 | 0.139922 |
| A1, A2->VLPFC, OFC             | 0.057846 | 0.054627 |
| A1, A2->PCC1, DACC             | 0.012768 | 0.011779 |
| OPCG, IFG->S1, S2, S3, SPS     | 0.101987 | 0.094494 |

**Table S3 D:** Averaged tPDC values for each group in the SMN (PD>HC in **red**, HC>PD in **blue**)

| band         | Connection                  | Group    |          |
|--------------|-----------------------------|----------|----------|
|              |                             | HC       | PD       |
| <b>theta</b> | S1, S2, S3, SPS->M1         | 0.047951 | 0.054828 |
|              | S1, S2, S3, SPS->SMA        | 0.089281 | 0.094602 |
|              | M1->TP                      | 0.126988 | 0.131198 |
|              | SMA->TP                     | 0.128104 | 0.139203 |
|              | MTG->PCG                    | 0.015475 | 0.019724 |
|              | PCC1, DACC->PCG             | 0.016522 | 0.017628 |
|              | A1, A2->PCG                 | 0.014492 | 0.016817 |
|              | PCG->TP                     | 0.13035  | 0.139825 |
|              | BA 48->TP                   | 0.128592 | 0.142052 |
|              | S1, S2, S3, SPS->PCC1, DACC | 0.023812 | 0.020183 |
|              | MTG->M1                     | 0.051833 | 0.045091 |
|              | MTG->PCC1, DACC             | 0.02583  | 0.018465 |
|              | STG, IPS->PCC1, DACC        | 0.02625  | 0.022778 |
|              | PCC1, DACC->SMA             | 0.087935 | 0.075914 |
|              | PCC1, DACC->A1, A2          | 0.015043 | 0.014521 |
|              | A1, A2->SMA                 | 0.07845  | 0.074159 |
|              | PCG->S1, S2, S3, SPS        | 0.11153  | 0.103372 |
| <b>alpha</b> | S1, S2, S3, SPS->TP         | 0.129829 | 0.13478  |
|              | SMA->TP                     | 0.121678 | 0.142537 |
|              | MTG->PCG                    | 0.016287 | 0.021375 |
|              | PCC1, DACC->PCG             | 0.013569 | 0.014815 |
|              | TP->SMA                     | 0.075711 | 0.078069 |
|              | TP->MTG                     | 0.326448 | 0.339547 |
|              | TP->A1, A2                  | 0.014164 | 0.014845 |
|              | A1, A2->PCG                 | 0.017544 | 0.01839  |
|              | PCG->SMA                    | 0.073949 | 0.078183 |
|              | BA 48->TP                   | 0.124223 | 0.13653  |
|              | S1, S2, S3, SPS->STG, IPS   | 0.087774 | 0.082281 |
|              | M1->TP                      | 0.135821 | 0.131458 |
|              | SMA->M1                     | 0.049551 | 0.044226 |
|              | MTG->S1, S2, S3, SPS        | 0.100692 | 0.08819  |
|              | MTG->M1                     | 0.052388 | 0.044139 |
|              | MTG->SMA                    | 0.076138 | 0.070265 |
|              | MTG->PCC1, DACC             | 0.024125 | 0.018915 |
|              | STG, IPS->S1, S2, S3, SPS   | 0.105324 | 0.096035 |

|             |                         |          |          |
|-------------|-------------------------|----------|----------|
|             | PCC1, DACC->SMA         | 0.096486 | 0.0749   |
|             | PCC1, DACC->A1, A2      | 0.014146 | 0.012747 |
|             | A1, A2->S1, S2, S3, SPS | 0.109753 | 0.096255 |
|             | A1, A2->SMA             | 0.081597 | 0.074963 |
|             | A1, A2->PCC1, DACC      | 0.025052 | 0.023942 |
|             | PCG->M1                 | 0.056777 | 0.05069  |
|             | BA 48->PCC1, DACC       | 0.026524 | 0.020676 |
|             | BA 48->PCG              | 0.016252 | 0.015401 |
| <b>beta</b> | S1, S2, S3, SPS->M1     | 0.04695  | 0.048393 |
|             | S1, S2, S3, SPS->PCG    | 0.016456 | 0.017378 |
|             | MTG->TP                 | 0.133657 | 0.138219 |
|             | MTG->PCG                | 0.017038 | 0.018233 |
|             | STG, IPS->TP            | 0.134899 | 0.139487 |
|             | PCC1, DACC->PCG         | 0.015714 | 0.016599 |
|             | TP->SMA                 | 0.068748 | 0.072836 |
|             | A1, A2->STG, IPS        | 0.094761 | 0.098122 |
|             | BA 48->TP               | 0.141094 | 0.147729 |
|             | SMA->S1, S2, S3, SPS    | 0.103607 | 0.093513 |
|             | MTG->PCC1, DACC         | 0.025301 | 0.021045 |
|             | TP->M1                  | 0.050249 | 0.048176 |
|             | A1, A2->M1              | 0.04911  | 0.047285 |
|             | A1, A2->SMA             | 0.091527 | 0.081437 |
|             | A1, A2->PCC1, DACC      | 0.03626  | 0.02933  |
|             | PCG->SMA                | 0.073397 | 0.070638 |
|             | BA 48->PCC1, DACC       | 0.025998 | 0.019467 |
